# Supplementary material for: The pentatricopeptide repeat MTSF1 protein stabilizes the nad4 mRNA in Arabidopsis mitochondria
Source: PubMed Central journal article supplement — Nucleic Acids Res. 2013 May 8;41(13):6650–63. doi: 10.1093/nar/gkt337 (PMC3711453; doi:10.1093/nar/gkt337), 2013-05-08
Supplement: supp_gkt337_nar-03073-v-2012-File013.pdf [file supp_gkt337_nar-03073-v-2012-File013.pdf]

| Name         | Sequence                                  | Purpose                                                                                   |
|--------------|-------------------------------------------|-------------------------------------------------------------------------------------------|
| Nd4-E1       | AGAACATTTCTGTGAATGC                       | <i>nd4</i> probe for RNA gel blot                                                         |
| Nd4-E6       | AAGTTACTTACCGGAT                          |                                                                                           |
| Nd7-E1       | ATGACGACTAGGAAAAGGCAA                     | <i>nd7</i> probe for RNA gel blot                                                         |
| Nd7-E4       | TCCACCTCTCCAACACAAT                       |                                                                                           |
| Nd9-E1       | TTTCAAATATAGTTGGGAGAC                     | <i>nd9</i> probe for RNA gel blot                                                         |
| Nd9-E2       | GCAAAATCGAAATAGCG                         |                                                                                           |
| Nd4L-E1      | ATGGATCTTATCAAATA                         | <i>nd4L</i> probe for RNA gel blot                                                        |
| Nd4L-E2      | TTCTACAGCAATAGTACCT                       |                                                                                           |
| Nd6-E1       | ATGATACTTTCTGTTTTG                        | <i>nd6</i> probe for RNA gel blot                                                         |
| Nd6-E2       | TCGTCTCTCTCATTATAGTC                      |                                                                                           |
| Nd5-E3       | TGAGTGTGGTTCGGTGATT                       | <i>nd5</i> probe for RNA gel blot                                                         |
| Nd5-E8       | TCTACCCCAAGAAGATAGAGAG                    |                                                                                           |
| Nd1-E7       | GTAGTGGGATCGTTCGGATTG                     | <i>nd1</i> probe for RNA gel blot                                                         |
| Nd1-E8       | TAAGGAAGCCATTGAAAGGTG                     |                                                                                           |
| Nd2-E1       | GCAGAATTCGTTCCGGATC                       | <i>nd2</i> probe for RNA gel blot                                                         |
| Nd2-E2       | TTTTGATGCTCGGATTACA                       |                                                                                           |
| Nd3-E1       | AAAGTGGGCTGTAATGATG                       | <i>nd3</i> probe for RNA gel blot                                                         |
| Nd3-E2       | TCTTGTGGGAGGTACTGC                        |                                                                                           |
| Nd3-E3       | ACCTACCCAGAAAATGTGCG                      |                                                                                           |
| Nd3-E4       | TGTGCCCTATCACTTACTCC                      |                                                                                           |
| 3'ND4-1      | GAGGAUUCAGCAAAGAAAAGAAAACGGGU             | RNA binding assays                                                                        |
| 3'ND4-2      | AACAUGGCAAAUUUCAUUUA                      |                                                                                           |
| 3'ND4-3      | CAAGAAAAGAAAACGGGU                        |                                                                                           |
| 3'ND4-4      | CAACAUCUUAUUGUGUAUUUGAGGAUUUU             |                                                                                           |
| AS-3'UTR-ND4 | ACCGTTTTTCTTTCTTTGCTGATTCCTC              | sRNA detection                                                                            |
| MTSF1-GW5    | CAAAAAGCAGGCTTAAATAAGATTAATGTCAAGTAG      | antibody production                                                                       |
| MTSF1-GW7    | CAAGAAAGCTGGGTTTCAAGAGGACAAACCATATGAG     |                                                                                           |
| GW3          | GGGGACCACTTTGTACAAGAAAGCTGGGCT            |                                                                                           |
| GW5          | GGGGACAAGTTTGTACA AAAAGCAGGCT             |                                                                                           |
| Nd4-E5       | GGCTATATAATCGTGTGG                        | <i>nd4</i> circular-RT-PCR analysis                                                       |
| Nd4-CRT1     | TGGCCGTAGAAGAGTCAAAATG                    |                                                                                           |
| MTSF1-3      | CCTAATCTCTCAAGCGCAATA                     | <i>mtsf1</i> mutants genotyping                                                           |
| MTSF1-5      | TTTCACTGTAGCCGTTATCT                      |                                                                                           |
| MTSF1-8      | CATATCTGGCATGTGACC                        |                                                                                           |
| MTSF1-7      | ATAAATGTTTGATTCAGGC                       |                                                                                           |
| LB-SALK2     | GCTTTCTCCCTTCTTCTC                        |                                                                                           |
| AOX1AF       | GTTTCGTCTCACGAGGCTTTAT                    | Quantitative RT-PCR analysis of mitochondrial alternative respiratory pathway transcripts |
| AOX1AR       | GGTGATTCGTTCTCTGTTTTT                     |                                                                                           |
| AOX1BF       | CAAGCTAATGGAAGACTGCTGTG                   |                                                                                           |
| AOX1BR       | CATCTTGCTGAAAAGTCTCACG                    |                                                                                           |
| AOX1CF       | ATTACTCCGTCGCTCTCTCCTT                    |                                                                                           |
| AOX1CR       | CTTACGCCCAATAACTAACT                      |                                                                                           |
| AOX1DF       | GGATTGAGGGGACATCTCATT                     |                                                                                           |
| AOX1DR       | CTGGCTGGTTATTTCCCACTTAC                   |                                                                                           |
| AOX2F        | CATGTTCTGTGAGTTCTGTTTTCC                  |                                                                                           |
| AOX2R        | ACCCATCCACCTCAAGTAAAA                     |                                                                                           |
| NDA1F        | GAATCTCGCAGACCCTTCTTC                     |                                                                                           |
| NDA1R        | GGTCCCAACGCATTAACCTACATC                  |                                                                                           |
| NDA2F        | TCATACACTCTCGCTTCTCGTT                    |                                                                                           |
| NDA2R        | GGCAAACCTGAATACTGACTCC                    |                                                                                           |
| NDB1F        | AAGTATAGTGGCATACTGCTGAT                   |                                                                                           |
| NDB1R        | TAGTTCTGGGAGACACAACCT                     |                                                                                           |
| NDB2F        | TCCTTCTCTACCAGGATTCTC                     |                                                                                           |
| NDB2R        | AGTTTTCAACAAACAGCACCCATT                  |                                                                                           |
| NDB4F        | ATTACACGCAGACGCTACTC                      |                                                                                           |
| NDB4R        | GCAAGAGAGGAGTGAAGAGGAA                    |                                                                                           |
| MTSF1-GW1    | CAAAAAGCAGGCTAAAATGAACAAAACAGTCGTAAG      | MTSF1 presequence amplification                                                           |
| MTSF1-GW2    | CAAGAAAGCTGGGTCCATAAACCTAGCAGTGAGAT       |                                                                                           |
| MTSF1-GW3    | CAAAAAGCAGGCTAAAATGGCTTTATCATGTTTCTTCGTTG | Expression of recombinant MTSF1                                                           |
| MTSF1-GW4    | CAAGAAAGCTGGGTCTCAGAGAGGACAAACCATATGAG    |                                                                                           |

#### Primers used for the splicing qRT-PCR experiment

|                            | Forward primer              | Reverse primer        |
|----------------------------|-----------------------------|-----------------------|
| <i>rpl2</i>                | CCGAAGACGGATCAAGGTAA        | CGCAATTCATCACCATTTTG  |
| <i>rpl2</i> intron exon2   | TTAGGAAGAGCCGTACGAGG        | CGCAATTCATCACCATTTTG  |
| <i>rps3</i>                | AGCCGAAGGTGAGTCTCGTA        | CCGATTCGGTAAGACTTGG   |
| <i>rps3</i> intron1 exon2  | AGCCGAAGGTGAGTCTCGTA        | TCTACGGCGGGTCACTAT    |
| <i>cox2</i>                | TGGGGGATTAATTGATTGGA        | TGATGCTGTACCTGGTCGTT  |
| <i>cox2</i> intron1 exon2  | TGGGGGATTAATTGATTGGA        | AGCAGTACGAGCTGAAAGGC  |
| <i>ccmFc</i>               | GTGGGTCCATGTAATGATCG        | CACATGGAGGAGTGTGCATC  |
| <i>ccmFc</i> intron1 exon1 | CCCAGATCGAATCAGAGTT         | CACATGGAGGAGTGTGCATC  |
| <i>nad1</i> exon1-2        | GACCAATAGATACTTCATAAGAGACCA | TTGCCATATCTTCGCTAGGTG |
| <i>nad1</i> intron1 exon2  | GACCAATAGATACTTCATAAGAGACCA | CGTGCTCGTACGGTTCATAG  |
| <i>nad1</i> exon2-3        | ATTGAGTCTCCGCTTCTGG         | TCTGCAGCTCAAATGGTCTC  |
| <i>nad1</i> intron2 exon2  | GGTTGGGTAGGGGAACATC         | TCTGCAGCTCAAATGGTCTC  |
| <i>nad1</i> exon3-4        | AAAAGAGCAGACCCATTGA         | TCCGTTTGTATCTCCAGAAG  |
| <i>nad1</i> intron3 exon4  | AAAAGAGCAGACCCATTGA         | GGGAGCTGTATGAGCGGTAA  |
| <i>nad1</i> exon4-5        | AGCCCGGATCTTCTTGA           | TCTCAATGGGTCTGCTC     |

|                           |                             |                             |
|---------------------------|-----------------------------|-----------------------------|
| <i>nad1</i> intron4 exon5 | AGCCCGGATCTTCTGA            | ACGGAGCTGCATCCCTACT         |
| <i>nad2</i> exon1-2       | GCGAGCAGAAGCAAGTTAT         | GGATCCTCCACACATGTTCC        |
| <i>nad2</i> intron1 exon2 | GCGAGCAGAAGCAAGTTAT         | CCCATTCTAACCAAGTGGAG        |
| <i>nad2</i> exon2-3       | AAAGGAACTGCAGTGATCTTGA      | AATATTTGATCTTAGGTGCATTTTC   |
| <i>nad2</i> intron2 exon2 | CCCAGTCCGATAGTTTACAA        | AATATTTGATCTTAGGTGCATTTTC   |
| <i>nad2</i> exon3-4       | GCGCAATAGAAAGGAATGCT        | CTATGGGTCTACTGGAGCTACCC     |
| <i>nad2</i> intron3 exon4 | GCGCAATAGAAAGGAATGCT        | GGCGAATTTCAAACCTTGTTG       |
| <i>nad2</i> exon4-5       | CAAAGGAGAGGGGTATAGCAA       | TATTTGTTCTTCGCGCTTT         |
| <i>nad2</i> intron4exon4  | CTTATTCGTGGCAACCTTCC        | TATTTGTTCTTCGCGCTTT         |
| <i>nad4</i> exon1-2       | ATTCTATGTTTTCCCGAAAGC       | GAAAACTGATATGCTGCCTTG       |
| <i>nad4</i> intron1 exon2 | CCGTATGATGCGGAAGTCTC        | GAAAACTGATATGCTGCCTTG       |
| <i>nad4</i> exon2-3       | AATACCATGTTTTCCCGAAG        | TGCTACCTCCAATTCCTGT         |
| <i>nad4</i> intron2 exon3 | GCGGAACGACCAGAAAAATA        | TGCTACCTCCAATTCCTGT         |
| <i>nad4</i> exon3-4       | TTCTCCATAAATCTCCGATT        | TGAAATTTGCCATGTTGCAC        |
| <i>nad4</i> intron3 exon4 | TCTAGCTTGGTTCGGAGAGC        | TGAAATTTGCCATGTTGCAC        |
| <i>nad5</i> exon1-2       | TGGACCAAGCTACTTATGGATG      | CCATGGATCTCATCGGAAAT        |
| <i>nad5</i> intron1 exon2 | TGGACCAAGCTACTTATGGATG      | TTCGCAAATAGGTCCGACT         |
| <i>nad5</i> exon2-3       | TACCTAAACCAATCATCATATC      | CTGGCTCTCGGGAGTCTCTT        |
| <i>nad5</i> intron2-exon2 | GTACGATCGTGTGCGGTGA         | CTGGCTCTCGGGAGTCTCTT        |
| <i>nad5</i> exon3-4       | AACTCGGATTCGGCAAGAA         | GATATGATGATTGGTTTAGGTA      |
| <i>nad5</i> intron3-exon4 | AACTCGGATTCGGCAAGAA         | GCCGTGTAATAGCGACCA          |
| <i>nad5</i> exon4-5       | AACATTGCAAAGGCATAATGA       | G TTCCTGCGTTTCGGATATG       |
| <i>nad5</i> intron4 exon5 | AACATTGCAAAGGCATAATGA       | CCTGTAACCCCATGATGT          |
| <i>nad7</i> exon1-2       | ACCTCAACATCCTGCTGCTC        | AAGGTAAAGCTTGAAGATAAGTTTTGT |
| <i>nad7</i> intron1 exon2 | ACGTTTTTAGGGGATCTG          | AAGGTAAAGCTTGAAGATAAGTTTTGT |
| <i>nad7</i> exon2-3       | GAGGGACTGAGAAATTAATAGAGTACA | TGGTACCTCGCAATTCAAAA        |
| <i>nad7</i> intron2 exon3 | AGTGGGAGAGCCGTGTTATG        | TGGTACCTCGCAATTCAAAA        |
| <i>nad7</i> exon3-4       | ACTGTCACTGCACAGCAAGC        | CATTGCACAATGATCCGAAG        |
| <i>nad7</i> intron3 exon4 | TAAAGTGAAGTGGTGGCCT         | CATTGCACAATGATCCGAAG        |
| <i>nad7</i> exon4-5       | GATCAAAGCCGATGATCGTAA       | AGGTGCTTCAACTGCGGTAT        |
| <i>nad7</i> intron4 exon5 | CGGCCAAATGACTACAGGAT        | AGGTGCTTCAACTGCGGTAT        |
| <i>18S nuclear rRNA</i>   | AAACGGTACCACATCCAAG         | ACTCGAAAGAGCCCGTATT         |

**Supplemental Table 1:** DNA and RNA oligonucleotides used in this analysis.
