# Supplementary figures and images for: The pentatricopeptide repeat MTSF1 protein stabilizes the nad4 mRNA in Arabidopsis mitochondria
Source: PubMed Central journal article supplement — Nucleic Acids Res. 2013 May 8;41(13):6650–63. doi: 10.1093/nar/gkt337 (PMC3711453; doi:10.1093/nar/gkt337), 2013-05-08

**A**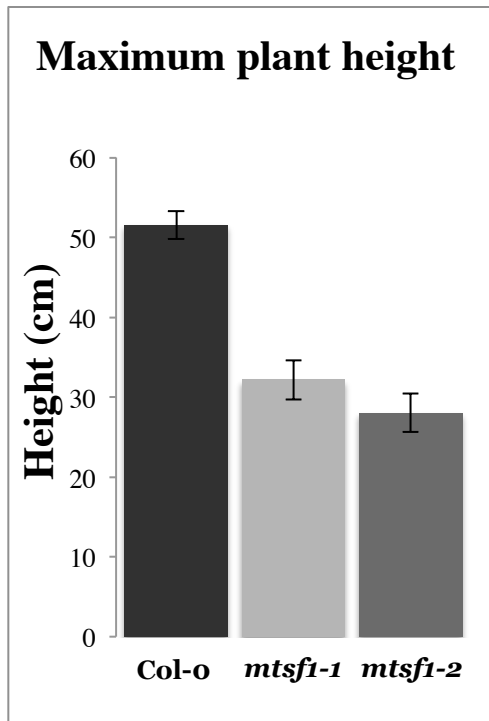**B**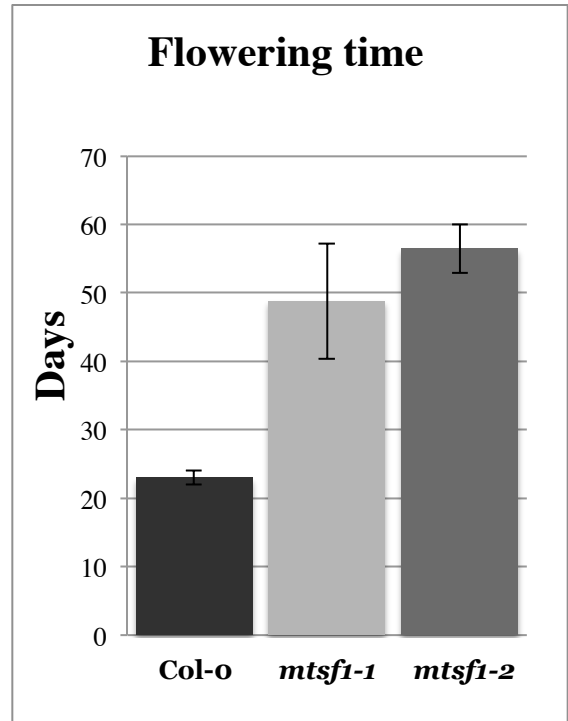**C**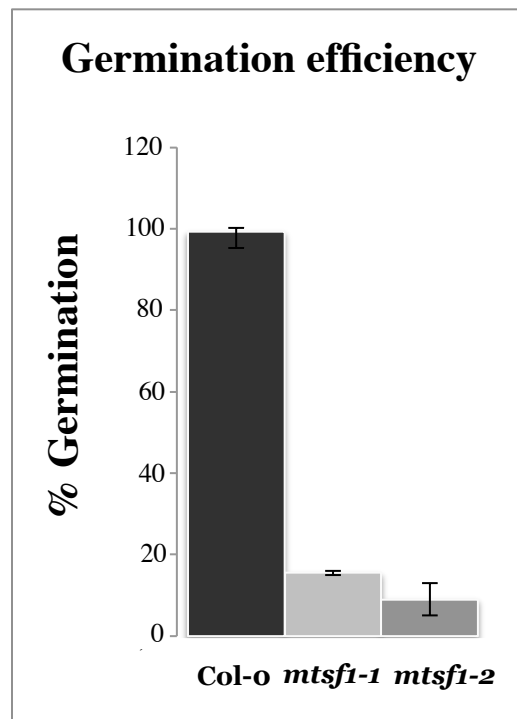

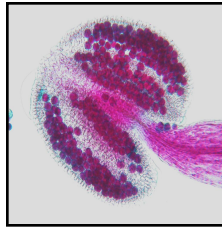

Col-0

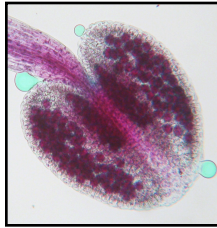

*mts1-1*

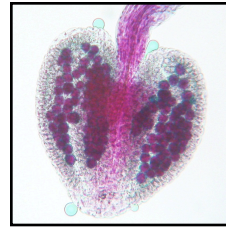

*mts1-2*

**A**

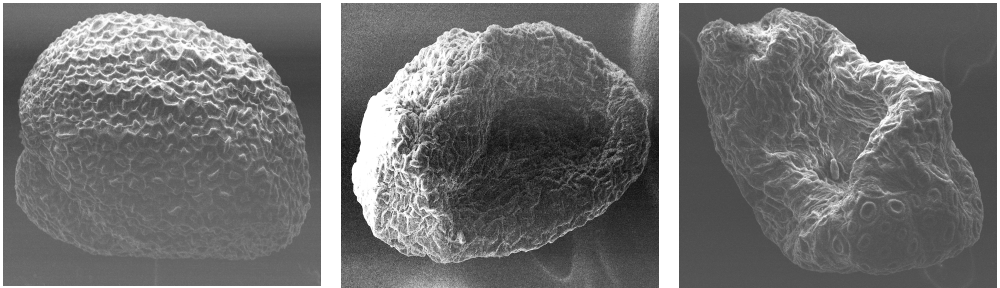

Col-o

*mts1-1*

*mts1-2*

**B**

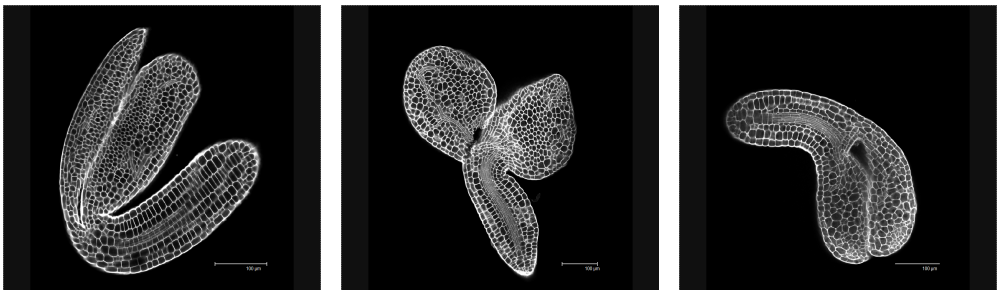

Col-o

*mts1-1*

*mts1-2*

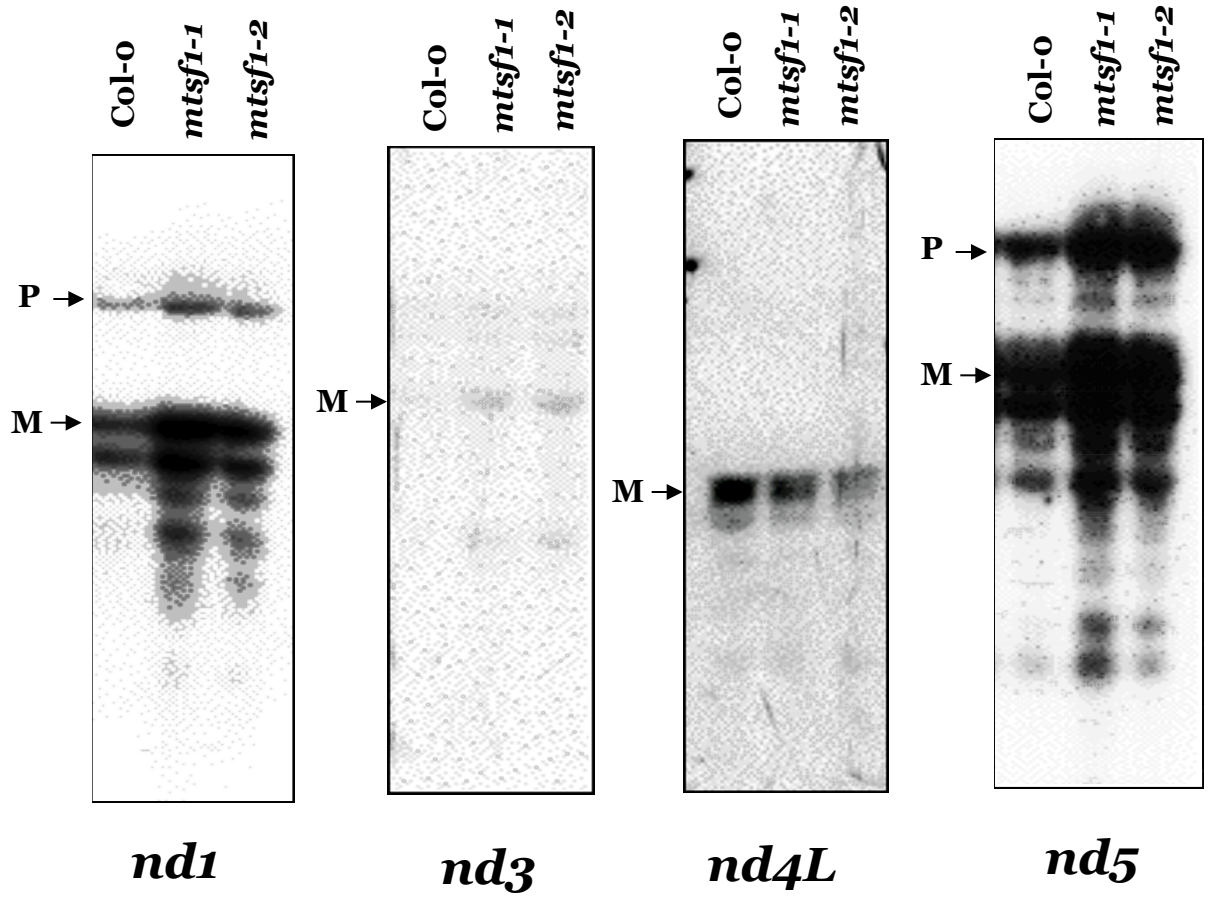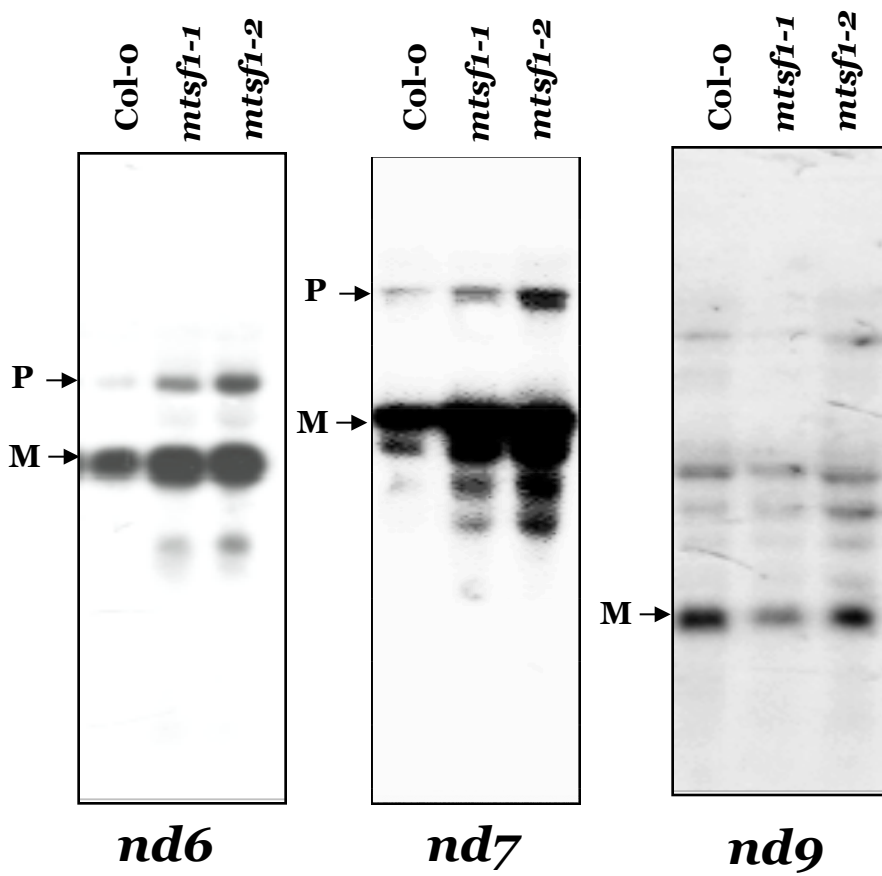

Supplementary Figure S4

**A**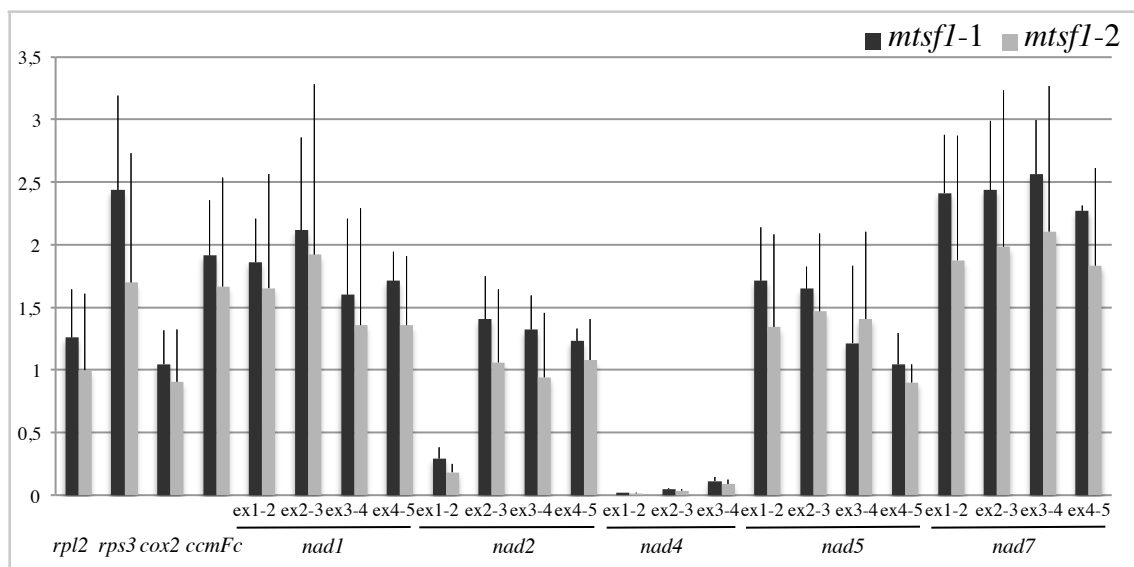**B**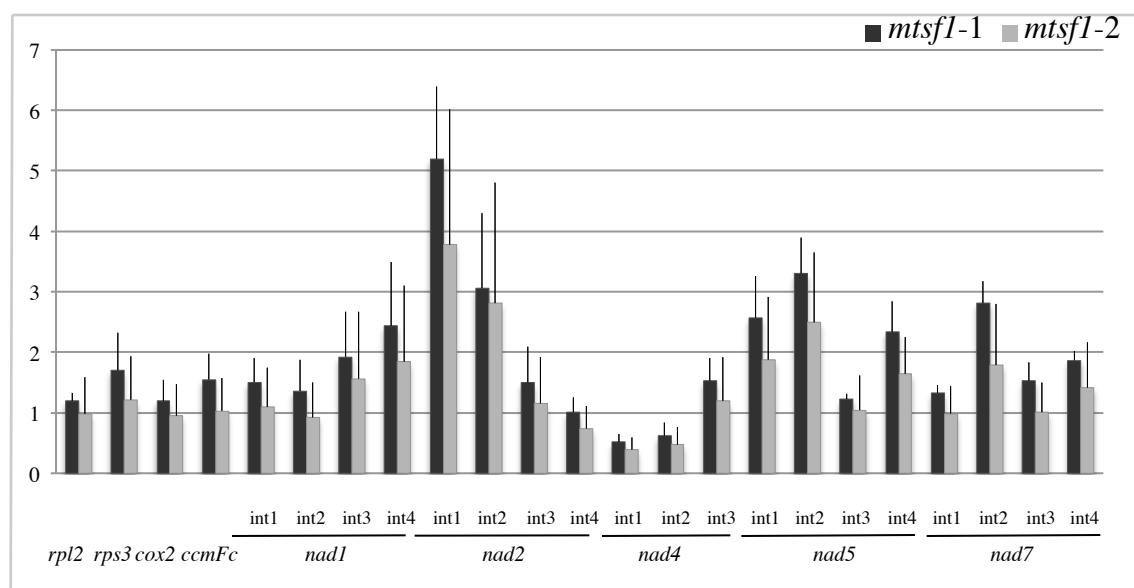

Supplementary Figure S5

Supplement: supp_gkt337_nar-03073-v-2012-File012.pdf [file supp_gkt337_nar-03073-v-2012-File012.pdf]
